# Supplementary material for: Biomarkers of mammographic density in premenopausal women
Source: PubMed Central journal article supplement (PMC8305592; doi:10.1186/s13058-021-01454-3), 2021-07-23

**Supplementary Table 1. Completeness and exclusions of the different metabolites, with limits of detection (LOD) and limits of quantification (LOQ)**

| Metabolites <sup>1</sup> | Results outside the measurable range (N=599 samples) |                                                                          | CV, % <sup>3</sup> |
|--------------------------|------------------------------------------------------|--------------------------------------------------------------------------|--------------------|
|                          | Samples, %                                           | Criteria for results considered out of the measurable range <sup>2</sup> |                    |
| <b>Acylcarnitines</b>    |                                                      |                                                                          |                    |
| C0                       | 0.0                                                  | <LOD                                                                     | 3.5                |
| C2                       | 0.0                                                  | <LOD                                                                     | 3.9                |
| C3                       | 0.0                                                  | <LOD                                                                     | 4.3                |
| C3-DC (C4-OH)            | 41.5                                                 | <LOD                                                                     | -                  |
| C4                       | 0.0                                                  | <LOD                                                                     | 4.7                |
| C5                       | 9.0                                                  | <LOD                                                                     | 6.2                |
| C10                      | 62.7                                                 | <LOD                                                                     | -                  |
| C10:1                    | 38.8                                                 | <LOD                                                                     | -                  |
| C12                      | 37.8                                                 | <LOD                                                                     | -                  |
| C12:1                    | 0.2                                                  | <LOD                                                                     | 8.5                |
| C14:1                    | 0.0                                                  | <LOD                                                                     | 5.0                |
| C14:2                    | 7.5                                                  | <LOD                                                                     | 5.1                |
| C16                      | 0.0                                                  | <LOD                                                                     | 4.3                |
| C16:1                    | 77.5                                                 | <LOD                                                                     | -                  |
| C18                      | 0.0                                                  | <LOD                                                                     | 7.0                |
| C18:1                    | 0.0                                                  | <LOD                                                                     | 4.8                |
| C18:2                    | 0.0                                                  | <LOD                                                                     | 5.9                |
| <b>Amino acids</b>       |                                                      |                                                                          |                    |
| Alanine                  | 0.0                                                  | <LLOQ (< 20 µmol/L)                                                      | 4.0                |
| Arginine                 | 1.8                                                  | >ULOQ (> 400 µmol/L)                                                     | 4.4                |
| Asparagine               | 0.0                                                  | <LLOQ (< 5 µmol/L)                                                       | 4.9                |
| Aspartate                | 0.0                                                  | <LLOQ (< 5 µmol/L)                                                       | 11.5               |
| Citrulline               | 0.0                                                  | <LLOQ (< 5 µmol/L)                                                       | 5.2                |
| Glutamine                | 0.0                                                  | <LLOQ (< 20 µmol/L)                                                      | 5.3                |
| Glutamate                | 0.0                                                  | <LLOQ (< 10 µmol/L)                                                      | 6.0                |
| Glycine                  | 0.0                                                  | <LLOQ (< 25 µmol/L)                                                      | 7.4                |
| Histidine                | 0.0                                                  | <LLOQ (< 5 µmol/L)                                                       | 3.9                |
| Isoleucine               | 0.0                                                  | <LLOQ (< 5 µmol/L)                                                       | 6.2                |
| Leucine                  | 0.0                                                  | <LLOQ (< 50 µmol/L)                                                      | 4.9                |
| Lysine                   | 0.0                                                  | <LLOQ (< 10 µmol/L)                                                      | 7.5                |
| Methionine               | 0.0                                                  | <LLOQ (< 5 µmol/L)                                                       | 9.6                |
| Ornithine                | 0.0                                                  | <LLOQ (< 5 µmol/L)                                                       | 7.5                |
| Phenylalanine            | 0.0                                                  | <LLOQ (< 5 µmol/L)                                                       | 4.1                |
| Proline                  | 0.0                                                  | <LLOQ (< 10 µmol/L)                                                      | 4.7                |
| Serine                   | 0.0                                                  | <LLOQ (< 5 µmol/L)                                                       | 4.0                |
| Threonine                | 0.0                                                  | <LLOQ (< 5 µmol/L)                                                       | 4.0                |
| Tryptophane              | 0.0                                                  | <LLOQ (< 5 µmol/L)                                                       | 4.3                |
| Tyrosine                 | 0.0                                                  | <LLOQ (< 5 µmol/L)                                                       | 3.8                |
| Valine                   | 0.0                                                  | <LLOQ (< 10 µmol/L)                                                      | 9.1                |
| <b>Biogenic amines</b>   |                                                      |                                                                          |                    |

|                             |      |                       |      |
|-----------------------------|------|-----------------------|------|
| ADMA                        | 0.0  | <LLOQ (< 0.25 µmol/L) | 10.4 |
| Creatinine                  | 0.0  | <LLOQ (< 10 µmol/L)   | 3.7  |
| Kynurenine                  | 0.5  | <LLOQ (< 1 µmol/L)    | 7.5  |
| Putrescine                  | 73.8 | <LLOQ (< 0.1 µmol/L)  | -    |
| SDMA                        | 0.0  | <LLOQ (< 0.1 µmol/L)  | 7.3  |
| Sarcosine                   | 48.5 | <LLOQ (< 1 µmol/L)    | -    |
| Serotonin <sup>4</sup>      | 1.0  | <LLOQ (< 0.1 µmol/L)  | -    |
| Spermidine                  | 54.2 | <LLOQ (< 0.25 µmol/L) | -    |
| Spermine                    | 94.5 | <LLOQ (< 0.25 µmol/L) | -    |
| Taurine                     | 17.3 | >ULOQ (> 200 µmol/L)  | 3.4  |
| alpha-AAA                   | 77.8 | <LLOQ (< 1 µmol/L)    | -    |
| t4-OH-Pro                   | 0.0  |                       | 5.8  |
| <b>Glycerophospholipids</b> |      |                       |      |
| PC aa C28:1                 | 0.0  | <LOD                  | 6.1  |
| PC aa C30:0                 | 0.0  | <LOD                  | 6.2  |
| PC aa C32:0                 | 0.0  | <LOD                  | 6.1  |
| PC aa C32:1                 | 0.0  | <LOD                  | 5.9  |
| PC aa C32:2                 | 0.0  | <LOD                  | 5.5  |
| PC aa C32:3                 | 0.0  | <LOD                  | 6.1  |
| PC aa C34:1                 | 0.0  | <LOD                  | 4.6  |
| PC aa C34:2                 | 0.0  | <LOD                  | 4.6  |
| PC aa C34:3                 | 0.0  | <LOD                  | 5.3  |
| PC aa C34:4                 | 0.0  | <LOD                  | 5.1  |
| PC aa C36:0                 | 0.0  | <LOD                  | 6.3  |
| PC aa C36:1                 | 0.0  | <LOD                  | 5.7  |
| PC aa C36:2                 | 0.0  | <LOD                  | 4.6  |
| PC aa C36:3                 | 0.0  | <LOD                  | 5.3  |
| PC aa C36:4                 | 0.0  | <LOD                  | 4.7  |
| PC aa C36:5                 | 0.0  | <LOD                  | 4.8  |
| PC aa C36:6                 | 0.0  | <LOD                  | 5.6  |
| PC aa C38:0                 | 0.0  | <LOD                  | 7.2  |
| PC aa C38:3                 | 0.0  | <LOD                  | 5.3  |
| PC aa C38:4                 | 0.0  | <LOD                  | 4.7  |
| PC aa C38:5                 | 0.0  | <LOD                  | 4.9  |
| PC aa C38:6                 | 0.0  | <LOD                  | 4.9  |
| PC aa C40:1                 | 39.8 | <LOD                  | -    |
| PC aa C40:2                 | 0.0  | <LOD                  | 8.2  |
| PC aa C40:3                 | 0.0  | <LOD                  | 8.7  |
| PC aa C40:4                 | 0.0  | <LOD                  | 5.0  |
| PC aa C40:5                 | 0.0  | <LOD                  | 5.3  |
| PC aa C40:6                 | 0.0  | <LOD                  | 5.7  |
| PC aa C42:0                 | 0.0  | <LOD                  | 7.4  |
| PC aa C42:1                 | 0.0  | <LOD                  | 10.9 |
| PC aa C42:2                 | 0.0  | <LOD                  | 9.5  |
| PC aa C42:4                 | 0.0  | <LOD                  | 13.3 |
| PC aa C42:5                 | 0.0  | <LOD                  | 9.0  |

|                      |     |      |      |
|----------------------|-----|------|------|
| PC aa C42:6          | 0.0 | <LOD | 6.3  |
| PC ae C30:0          | 0.0 | <LOD | 8.5  |
| PC ae C30:2          | 0.0 | <LOD | 11.7 |
| PC ae C32:1          | 0.0 | <LOD | 6.2  |
| PC ae C32:2          | 0.0 | <LOD | 6.7  |
| PC ae C34:0          | 0.0 | <LOD | 6.8  |
| PC ae C34:1          | 0.0 | <LOD | 5.5  |
| PC ae C34:2          | 0.0 | <LOD | 6.2  |
| PC ae C34:3          | 0.0 | <LOD | 5.6  |
| PC ae C36:0          | 3.2 | <LOD | 7.6  |
| PC ae C36:1          | 0.0 | <LOD | 7.0  |
| PC ae C36:2          | 0.0 | <LOD | 5.2  |
| PC ae C36:3          | 0.0 | <LOD | 4.8  |
| PC ae C36:4          | 0.0 | <LOD | 5.5  |
| PC ae C36:5          | 0.0 | <LOD | 5.4  |
| PC ae C38:0          | 0.0 | <LOD | 7.6  |
| PC ae C38:2          | 0.0 | <LOD | 7.6  |
| PC ae C38:3          | 0.0 | <LOD | 7.1  |
| PC ae C38:4          | 0.0 | <LOD | 5.1  |
| PC ae C38:5          | 0.0 | <LOD | 5.5  |
| PC ae C38:6          | 0.0 | <LOD | 4.9  |
| PC ae C40:1          | 0.0 | <LOD | 8.3  |
| PC ae C40:2          | 0.0 | <LOD | 5.7  |
| PC ae C40:3          | 0.0 | <LOD | 5.6  |
| PC ae C40:4          | 0.0 | <LOD | 7.4  |
| PC ae C40:5          | 0.0 | <LOD | 6.7  |
| PC ae C40:6          | 0.0 | <LOD | 5.8  |
| PC ae C42:1          | 0.0 | <LOD | 10.1 |
| PC ae C42:2          | 0.0 | <LOD | 6.4  |
| PC ae C42:3          | 0.0 | <LOD | 7.4  |
| PC ae C42:4          | 0.5 | <LOD | 7.8  |
| PC ae C42:5          | 0.0 | <LOD | 5.2  |
| PC ae C44:3          | 0.0 | <LOD | 11.8 |
| PC ae C44:4          | 0.0 | <LOD | 7.1  |
| PC ae C44:5          | 0.0 | <LOD | 6.5  |
| PC ae C44:6          | 0.0 | <LOD | 5.9  |
| lysoPC a C16:0       | 0.0 | <LOD | 5.7  |
| lysoPC a C16:1       | 0.0 | <LOD | 6.4  |
| lysoPC a C17:0       | 0.0 | <LOD | 6.3  |
| lysoPC a C18:0       | 0.0 | <LOD | 5.8  |
| lysoPC a C18:1       | 0.0 | <LOD | 6.1  |
| lysoPC a C18:2       | 0.0 | <LOD | 6.8  |
| lysoPC a C20:3       | 0.0 | <LOD | 5.2  |
| lysoPC a C20:4       | 0.0 | <LOD | 5.9  |
| lysoPC a C24:0       | 0.0 | <LOD | 9.9  |
| <b>Sphingolipids</b> |     |      |      |

|                                                                                                                                                                                                                                                                                                                                                                                                                                                                                                                                                                                                                                                                                                                                       |     |                       |      |
|---------------------------------------------------------------------------------------------------------------------------------------------------------------------------------------------------------------------------------------------------------------------------------------------------------------------------------------------------------------------------------------------------------------------------------------------------------------------------------------------------------------------------------------------------------------------------------------------------------------------------------------------------------------------------------------------------------------------------------------|-----|-----------------------|------|
| SM C16:0                                                                                                                                                                                                                                                                                                                                                                                                                                                                                                                                                                                                                                                                                                                              | 0.0 | <LOD                  | 6.1  |
| SM C16:1                                                                                                                                                                                                                                                                                                                                                                                                                                                                                                                                                                                                                                                                                                                              | 0.0 | <LOD                  | 6.3  |
| SM C18:0                                                                                                                                                                                                                                                                                                                                                                                                                                                                                                                                                                                                                                                                                                                              | 0.0 | <LOD                  | 7.2  |
| SM C18:1                                                                                                                                                                                                                                                                                                                                                                                                                                                                                                                                                                                                                                                                                                                              | 0.0 | <LOD                  | 6.4  |
| SM C20:2                                                                                                                                                                                                                                                                                                                                                                                                                                                                                                                                                                                                                                                                                                                              | 0.0 | <LOD                  | 9.7  |
| SM C24:0                                                                                                                                                                                                                                                                                                                                                                                                                                                                                                                                                                                                                                                                                                                              | 0.0 | <LOD                  | 6.0  |
| SM C24:1                                                                                                                                                                                                                                                                                                                                                                                                                                                                                                                                                                                                                                                                                                                              | 0.0 | <LOD                  | 6.5  |
| SM C26:0                                                                                                                                                                                                                                                                                                                                                                                                                                                                                                                                                                                                                                                                                                                              | 9.0 | <LOD                  | 11.7 |
| SM C26:1                                                                                                                                                                                                                                                                                                                                                                                                                                                                                                                                                                                                                                                                                                                              | 1.0 | <LOD                  | 10.7 |
| SM (OH) C14:1                                                                                                                                                                                                                                                                                                                                                                                                                                                                                                                                                                                                                                                                                                                         | 0.0 | <LOD                  | 6.5  |
| SM (OH) C16:1                                                                                                                                                                                                                                                                                                                                                                                                                                                                                                                                                                                                                                                                                                                         | 0.0 | <LOD                  | 6.2  |
| SM (OH) C22:1                                                                                                                                                                                                                                                                                                                                                                                                                                                                                                                                                                                                                                                                                                                         | 0.0 | <LOD                  | 7.0  |
| SM (OH) C22:2                                                                                                                                                                                                                                                                                                                                                                                                                                                                                                                                                                                                                                                                                                                         | 0.0 | <LOD                  | 5.8  |
| SM (OH) C24:1                                                                                                                                                                                                                                                                                                                                                                                                                                                                                                                                                                                                                                                                                                                         | 0.0 | <LOD                  | 9.9  |
| <b>Hexose</b>                                                                                                                                                                                                                                                                                                                                                                                                                                                                                                                                                                                                                                                                                                                         |     |                       |      |
| Hexose                                                                                                                                                                                                                                                                                                                                                                                                                                                                                                                                                                                                                                                                                                                                | 0.0 | <LLOQ (< 1500 µmol/L) | 3.4  |
| <sup>1</sup> Metabolites in gray were excluded from the statistical analysis because more than 20% of the measures were outside the measurable range.<br><sup>2</sup> Limit of detection (LOD) is applicable to acylcarnitines, glycerophospholipids, sphingolipids. Lower limit of quantification (LLOQ) or upper limit of quantification (ULOQ) is applicable to amino acids, biogenic amines and hexose. No metabolites had values both under LLOQ and over ULOQ.<br><sup>3</sup> Mean intra- and inter-batch coefficients of variation (CVs) based on two quality control samples measured in duplicate in each batch.<br><sup>4</sup> CV for serotonin not calculated because measures in quality controls were lower than LLOQ. |     |                       |      |

Supplementary Table 2. Geometric means of metabolites concentrations

| <b>Variable</b>      | <b>N</b> | <b>Geometric mean (95% CI) (μmol/L)</b> |
|----------------------|----------|-----------------------------------------|
| <b>C0</b>            | 573      | 32.18 (31.69-32.69)                     |
| <b>C2</b>            | 573      | 5.31 (5.19-5.44)                        |
| <b>C3</b>            | 573      | 0.30 (0.29-0.31)                        |
| <b>C4</b>            | 573      | 0.15 (0.14-0.15)                        |
| <b>C5</b>            | 573      | 0.11 (0.11-0.12)                        |
| <b>C12:1</b>         | 573      | 0.21 (0.21-0.21)                        |
| <b>C14:1</b>         | 573      | 0.06 (0.06-0.06)                        |
| <b>C14:2</b>         | 573      | 0.03 (0.03-0.03)                        |
| <b>C16</b>           | 573      | 0.11 (0.11-0.11)                        |
| <b>C18</b>           | 573      | 0.05 (0.04-0.05)                        |
| <b>C18:1</b>         | 573      | 0.12 (0.12-0.13)                        |
| <b>C18:2</b>         | 573      | 0.06 (0.06-0.06)                        |
| <b>Alanine</b>       | 573      | 469.21 (461.08-477.48)                  |
| <b>Arginine</b>      | 573      | 157.23 (153.14-161.43)                  |
| <b>Asparagine</b>    | 573      | 51.05 (50.19-51.92)                     |
| <b>Aspartate</b>     | 573      | 51.50 (50.28-52.75)                     |
| <b>Citrulline</b>    | 573      | 25.86 (25.32-26.41)                     |
| <b>Glutamine</b>     | 573      | 491.29 (483.10-499.62)                  |
| <b>Glutamate</b>     | 573      | 153.86 (148.98-158.90)                  |
| <b>Glycine</b>       | 573      | 348.92 (341.28-356.73)                  |
| <b>Histidine</b>     | 573      | 99.11 (97.83-100.41)                    |
| <b>Isoleucine</b>    | 573      | 76.22 (74.96-77.51)                     |
| <b>Leucine</b>       | 573      | 155.26 (152.62-157.94)                  |
| <b>Lysine</b>        | 573      | 247.69 (243.53-251.93)                  |
| <b>Methionine</b>    | 573      | 23.47 (22.99-23.95)                     |
| <b>Ornithine</b>     | 573      | 93.29 (90.95-95.68)                     |
| <b>Phenylalanine</b> | 573      | 99.09 (97.54-100.66)                    |
| <b>Proline</b>       | 573      | 201.05 (196.96-205.23)                  |
| <b>Serine</b>        | 573      | 179.38 (176.39-182.41)                  |
| <b>Threonine</b>     | 573      | 133.40 (130.66-136.19)                  |
| <b>Tryptophane</b>   | 573      | 63.24 (62.40-64.09)                     |
| <b>Tyrosine</b>      | 573      | 73.30 (72.02-74.61)                     |
| <b>Valine</b>        | 573      | 231.29 (227.26-235.39)                  |
| <b>ADMA</b>          | 573      | 0.47 (0.47-0.48)                        |
| <b>Creatinine</b>    | 573      | 53.09 (52.37-53.83)                     |
| <b>Kynurenine</b>    | 573      | 2.08 (2.04-2.12)                        |
| <b>SDMA</b>          | 573      | 0.42 (0.41-0.42)                        |
| <b>Serotonin</b>     | 573      | 0.67 (0.64-0.70)                        |
| <b>Taurine</b>       | 573      | 147.71 (144.49-151.00)                  |
| <b>t4-OH-Pro</b>     | 573      | 10.59 (10.18-11.01)                     |
| <b>PC aa C28:1</b>   | 573      | 1.78 (1.73-1.82)                        |
| <b>PC aa C30:0</b>   | 573      | 2.31 (2.25-2.37)                        |
| <b>PC aa C32:0</b>   | 573      | 17.31 (16.97-17.65)                     |

|             |     |                        |
|-------------|-----|------------------------|
| PC aa C32:1 | 573 | 18.59 (17.95-19.24)    |
| PC aa C32:2 | 573 | 6.75 (6.58-6.94)       |
| PC aa C32:3 | 573 | 0.99 (0.97-1.01)       |
| PC aa C34:1 | 573 | 238.47 (234.24-242.78) |
| PC aa C34:2 | 573 | 525.26 (518.64-531.96) |
| PC aa C34:3 | 573 | 25.11 (24.62-25.61)    |
| PC aa C34:4 | 573 | 2.36 (2.29-2.42)       |
| PC aa C36:0 | 573 | 2.64 (2.58-2.70)       |
| PC aa C36:1 | 573 | 44.09 (43.19-45.00)    |
| PC aa C36:2 | 573 | 288.26 (283.94-292.64) |
| PC aa C36:3 | 573 | 177.98 (175.08-180.92) |
| PC aa C36:4 | 573 | 197.37 (193.37-201.45) |
| PC aa C36:5 | 573 | 16.77 (16.21-17.34)    |
| PC aa C36:6 | 573 | 0.94 (0.91-0.97)       |
| PC aa C38:0 | 573 | 2.30 (2.25-2.35)       |
| PC aa C38:3 | 573 | 49.27 (48.27-50.29)    |
| PC aa C38:4 | 573 | 99.18 (97.06-101.34)   |
| PC aa C38:5 | 573 | 48.30 (47.22-49.41)    |
| PC aa C38:6 | 573 | 59.60 (58.12-61.12)    |
| PC aa C40:2 | 573 | 0.48 (0.45-0.52)       |
| PC aa C40:3 | 573 | 0.62 (0.59-0.65)       |
| PC aa C40:4 | 573 | 3.43 (3.35-3.51)       |
| PC aa C40:5 | 573 | 7.31 (7.14-7.48)       |
| PC aa C40:6 | 573 | 18.15 (17.70-18.61)    |
| PC aa C42:0 | 573 | 0.29 (0.28-0.29)       |
| PC aa C42:1 | 573 | 0.16 (0.16-0.16)       |
| PC aa C42:2 | 573 | 0.16 (0.15-0.17)       |
| PC aa C42:4 | 573 | 0.18 (0.17-0.19)       |
| PC aa C42:5 | 573 | 0.26 (0.25-0.26)       |
| PC aa C42:6 | 573 | 0.28 (0.28-0.29)       |
| PC ae C30:0 | 573 | 0.21 (0.20-0.21)       |
| PC ae C30:2 | 573 | 0.08 (0.08-0.09)       |
| PC ae C32:1 | 573 | 3.41 (3.34-3.49)       |
| PC ae C32:2 | 573 | 1.04 (1.02-1.06)       |
| PC ae C34:0 | 573 | 1.64 (1.60-1.68)       |
| PC ae C34:1 | 573 | 12.64 (12.41-12.88)    |
| PC ae C34:2 | 573 | 16.59 (16.24-16.94)    |
| PC ae C34:3 | 573 | 10.13 (9.88-10.39)     |
| PC ae C36:0 | 573 | 0.61 (0.58-0.63)       |
| PC ae C36:1 | 573 | 14.13 (13.54-14.74)    |
| PC ae C36:2 | 573 | 19.10 (18.72-19.49)    |
| PC ae C36:3 | 573 | 10.47 (10.26-10.68)    |
| PC ae C36:4 | 573 | 20.80 (20.34-21.28)    |
| PC ae C36:5 | 573 | 11.87 (11.57-12.18)    |
| PC ae C38:0 | 573 | 1.70 (1.66-1.73)       |
| PC ae C38:2 | 573 | 4.49 (4.25-4.76)       |

|                       |     |                        |
|-----------------------|-----|------------------------|
| <b>PC ae C38:3</b>    | 573 | 8.33 (7.93-8.75)       |
| <b>PC ae C38:4</b>    | 573 | 14.14 (13.86-14.41)    |
| <b>PC ae C38:5</b>    | 573 | 17.94 (17.56-18.32)    |
| <b>PC ae C38:6</b>    | 573 | 6.55 (6.39-6.70)       |
| <b>PC ae C40:1</b>    | 573 | 1.02 (0.99-1.05)       |
| <b>PC ae C40:2</b>    | 573 | 1.77 (1.70-1.84)       |
| <b>PC ae C40:3</b>    | 573 | 2.20 (2.05-2.36)       |
| <b>PC ae C40:4</b>    | 573 | 3.12 (3.00-3.26)       |
| <b>PC ae C40:5</b>    | 573 | 4.60 (4.43-4.77)       |
| <b>PC ae C40:6</b>    | 573 | 3.54 (3.47-3.62)       |
| <b>PC ae C42:1</b>    | 573 | 0.42 (0.40-0.43)       |
| <b>PC ae C42:2</b>    | 573 | 0.42 (0.41-0.43)       |
| <b>PC ae C42:3</b>    | 573 | 0.61 (0.59-0.63)       |
| <b>PC ae C42:4</b>    | 573 | 0.74 (0.71-0.76)       |
| <b>PC ae C42:5</b>    | 573 | 1.74 (1.69-1.79)       |
| <b>PC ae C44:3</b>    | 573 | 0.09 (0.08-0.09)       |
| <b>PC ae C44:4</b>    | 573 | 0.20 (0.19-0.20)       |
| <b>PC ae C44:5</b>    | 573 | 0.68 (0.66-0.69)       |
| <b>PC ae C44:6</b>    | 573 | 0.57 (0.56-0.59)       |
| <b>lysoPC a C16:0</b> | 573 | 156.23 (152.58-159.96) |
| <b>lysoPC a C16:1</b> | 573 | 4.30 (4.20-4.41)       |
| <b>lysoPC a C17:0</b> | 573 | 2.96 (2.88-3.04)       |
| <b>lysoPC a C18:0</b> | 573 | 47.71 (46.49-48.96)    |
| <b>lysoPC a C18:1</b> | 573 | 25.45 (24.89-26.02)    |
| <b>lysoPC a C18:2</b> | 573 | 25.22 (24.68-25.77)    |
| <b>lysoPC a C20:3</b> | 573 | 2.08 (2.03-2.13)       |
| <b>lysoPC a C20:4</b> | 573 | 5.91 (5.75-6.07)       |
| <b>lysoPC a C24:0</b> | 573 | 0.11 (0.11-0.12)       |
| <b>SM C16:0</b>       | 573 | 67.14 (65.77-68.54)    |
| <b>SM C16:1</b>       | 573 | 10.49 (10.29-10.69)    |
| <b>SM C18:0</b>       | 573 | 12.19 (11.92-12.46)    |
| <b>SM C18:1</b>       | 573 | 6.78 (6.63-6.93)       |
| <b>SM C20:2</b>       | 573 | 0.28 (0.27-0.28)       |
| <b>SM C24:0</b>       | 573 | 6.60 (6.47-6.73)       |
| <b>SM C24:1</b>       | 573 | 13.11 (12.82-13.40)    |
| <b>SM C26:0</b>       | 573 | 0.03 (0.03-0.03)       |
| <b>SM C26:1</b>       | 573 | 0.06 (0.06-0.07)       |
| <b>SM (OH) C14:1</b>  | 573 | 3.84 (3.74-3.94)       |
| <b>SM (OH) C16:1</b>  | 573 | 2.02 (1.97-2.07)       |
| <b>SM (OH) C22:1</b>  | 573 | 5.16 (5.05-5.27)       |
| <b>SM (OH) C22:2</b>  | 573 | 3.64 (3.56-3.73)       |
| <b>SM (OH) C24:1</b>  | 573 | 0.39 (0.38-0.40)       |
| <b>Hexose</b>         | 573 | 4423.7 (4334.1-4515.2) |

Supplementary Figure 1. Pearson's partial correlations between metabolites adjusted for age, state, and batch

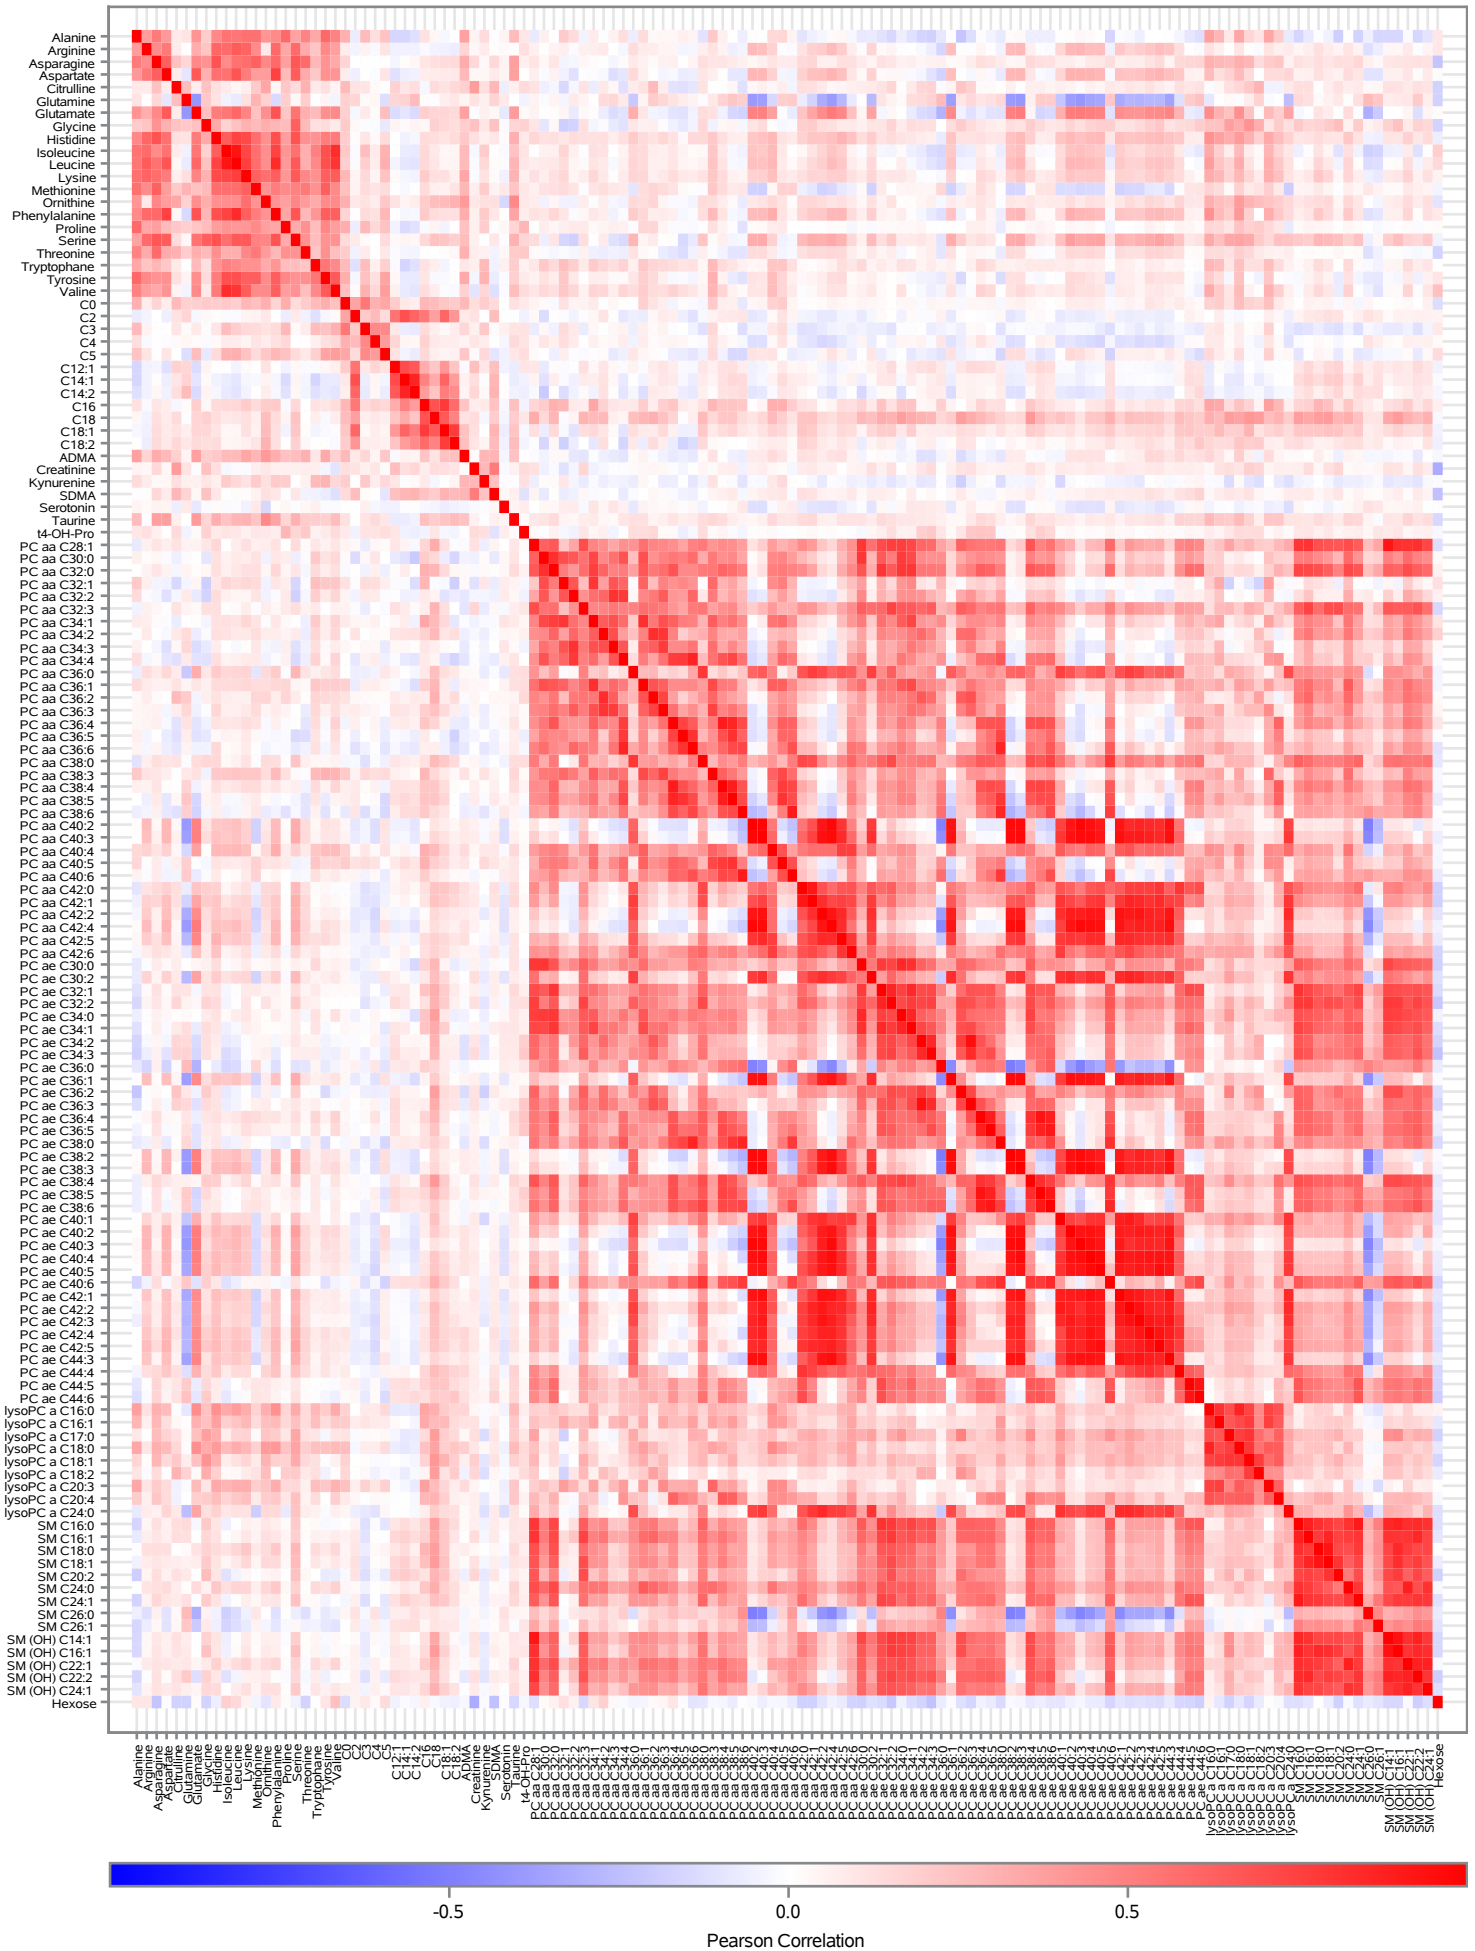



**Supplementary Figure 2. Associations between metabolites and non-dense area. A: Raw P-values. B: Adjusted P-values.** Estimates per standard deviation increase in residuals of metabolites on batch were obtained from linear regression adjusted for age, BMI, age at menarche, family history of cancer, history of benign breast disease, use of oral contraceptive, number of full-term pregnancies, age at first full-term pregnancy, breastfeeding, alcohol intake, smoking status, socioeconomic status, and physical activity. Dotted lines represent statistical significance thresholds for raw P-values (A) and for P-values adjusted by permutation-based stepdown *minP* (B). Abbreviations: ae: acyl-alkyl; aa: acyl-acyl; PC: phosphatidylcholine; SM: sphingomyelin; SD: standard deviation.

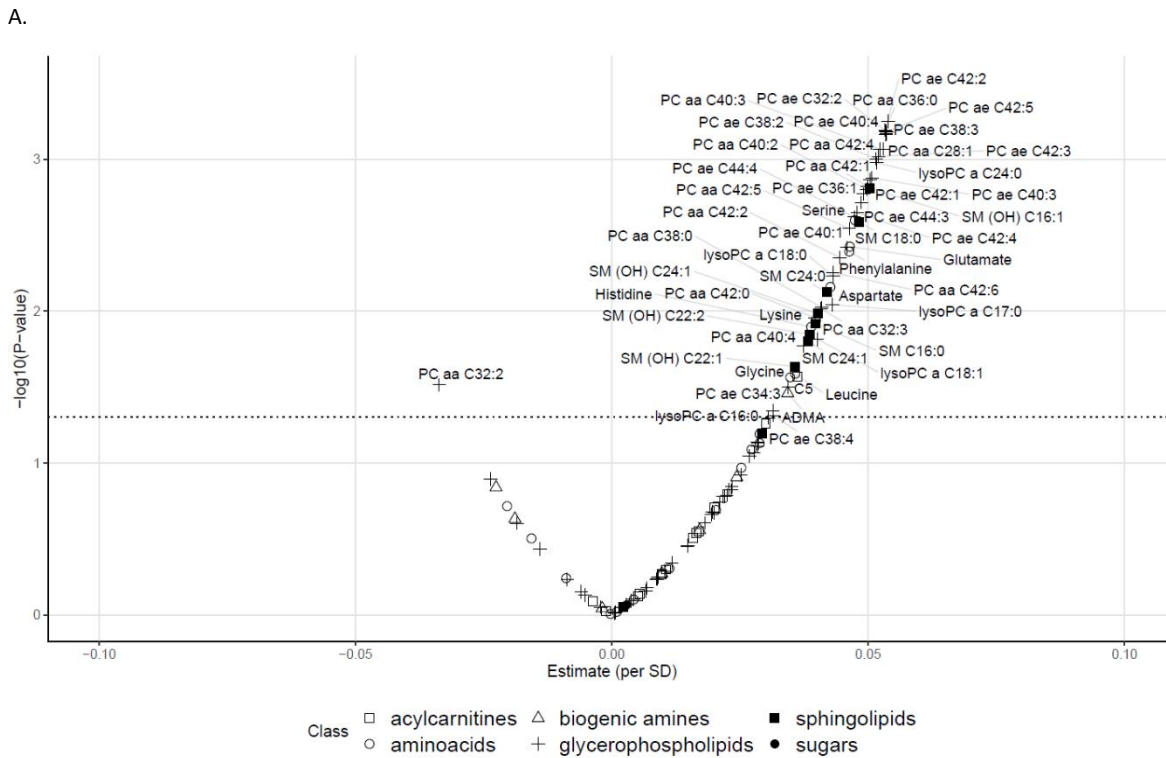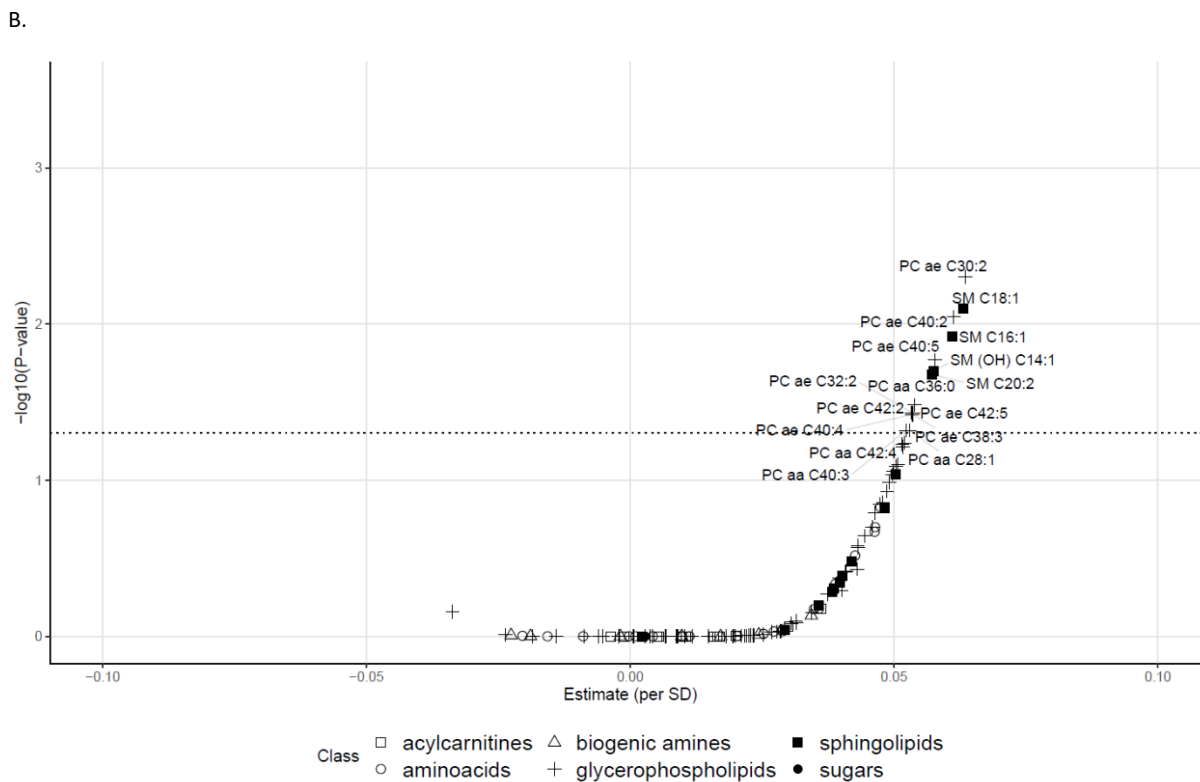

Supplement: 13058_2021_1454_MOESM1_ESM.pdf [file 13058_2021_1454_MOESM1_ESM.pdf]
